# Supplementary material for: Nasopharyngeal carcinoma risk prediction via salivary detection of host and Epstein-Barr virus genetic variants
Source: PubMed Central journal article supplement (PMC5707005; doi:10.18632/oncotarget.11144), 2016-08-09
Supplement: oncotarget-08-95066-s001.pdf [file oncotarget-08-95066-s001.pdf]

## Nasopharyngeal carcinoma risk prediction *via* salivary detection of host and Epstein-Barr virus genetic variants

### Supplementary Materials

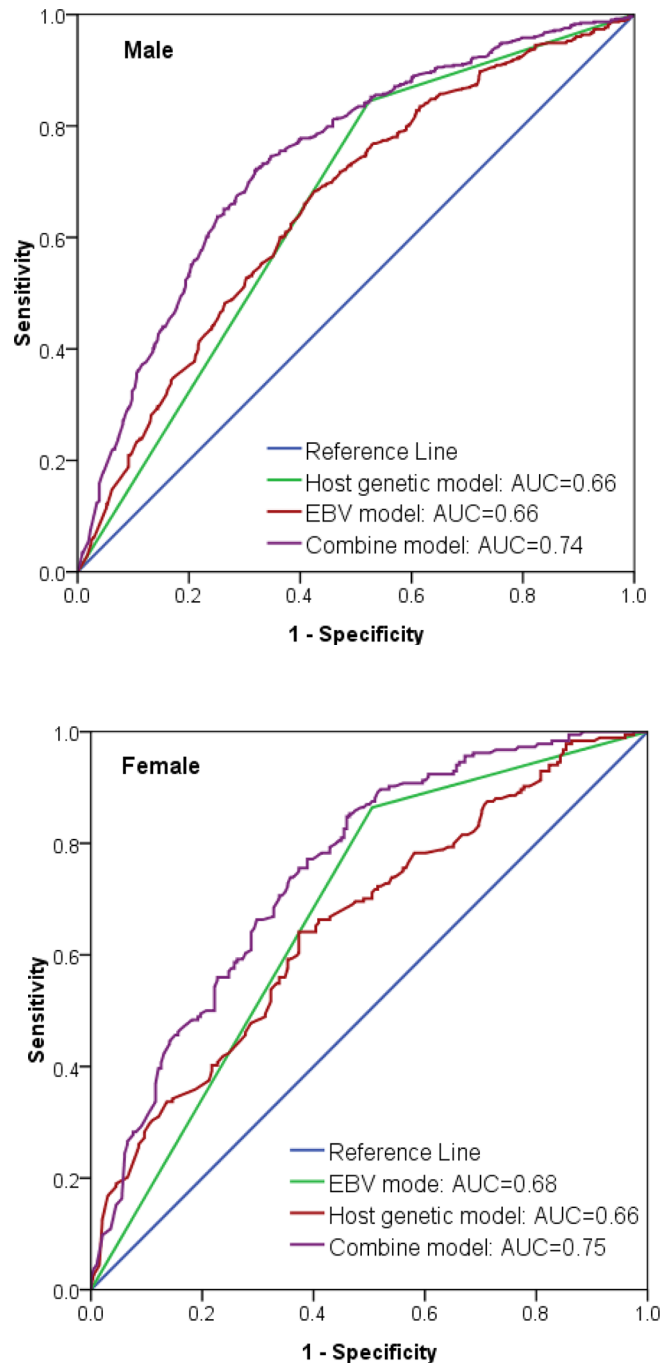

**Supplementary Figures: Receiver-operating characteristic (ROC) curve analysis in males and females.** Areas under the ROC curves (AUCs) were used as measures of the predictive power of the risk-assessment models based on host and EBV genetic variants. The host genetic model factors were 7 SNPs: rs1412829, rs28421666, rs2860580, rs2894207, rs31489, rs6774494, and rs9510787. The EBV model factor was G155391A. The combined model factors were the EBV variant and the 7 host SNPs.

**Supplementary Table S1: AUC of the genetic only, EBV only and combine models**

|                            | Model                                                                                                                                                                                                                                                                                | AUC (95%CI)         | P value <sup>e</sup> |
|----------------------------|--------------------------------------------------------------------------------------------------------------------------------------------------------------------------------------------------------------------------------------------------------------------------------------|---------------------|----------------------|
| Genetic model <sup>a</sup> | $\text{logitP}_1^d = 0.31 \times \text{rs1412829} + 0.29 \times \text{rs28421666} + 0.49 \times \text{rs2860580} + 0.58 \times \text{rs2894207} + 0.13 \times \text{rs31489} + 0.11 \times \text{rs6774494} + 0.19 \times \text{rs9510787} - 3.36$                                   | 0.65<br>(0.62–0.68) | < 0.001              |
| EBV model <sup>b</sup>     | $\text{logitP}_2^d = 1.65 \times \text{EBV G155391A} - 1.29$                                                                                                                                                                                                                         | 0.67<br>(0.64–0.69) | < 0.001              |
| Combine model <sup>c</sup> | $\text{logitP}_3^d = 0.27 \times \text{rs1412829} + 0.24 \times \text{rs28421666} + 0.48 \times \text{rs2860580} + 0.45 \times \text{rs2894207} + 0.06 \times \text{rs31489} + 0.13 \times \text{rs6774494} + 0.17 \times \text{rs9510787} + 1.57 \times \text{EBV G155391A} - 3.97$ | 0.74<br>(0.71–0.76) | < 0.001              |

a. Genetic model factors including rs1412829, rs28421666, rs2860580, rs2894207, rs31489, rs6774494, rs9510787.

b. EBV model factor including EBV variation based on the Loc155391.

c. Combine model factors including host genetic and EBV variants.

d. P was predicted probability of NPC occurrence.

e. P value was estimated using the Omnibus Test for the models.

**Supplementary Table S2: Reclassification of nasopharyngeal carcinoma (NPC) cases and population-based controls based on the combined (host and Epstein-Barr virus) risk prediction model versus the host genetic risk prediction model**

| Host genetic risk model                   | Combined risk model |            |          |       | Reclassified   |                |                            |
|-------------------------------------------|---------------------|------------|----------|-------|----------------|----------------|----------------------------|
|                                           | [0, 0.2]            | [0.2, 0.3] | [0.3, 1] | Total | Increased risk | Decreased risk | Net correctly reclassified |
| Controls                                  |                     |            |          |       |                |                |                            |
| [0, 0.2]                                  | 14                  | 7          | 0        | 21    | 41 (5%)        | 347 (43%)      | -0.38                      |
| [0.2, 0.3]                                | 60                  | 2          | 34       | 96    |                |                |                            |
| [0.3, 1]                                  | 101                 | 186        | 402      | 689   |                |                |                            |
| Total                                     | 175                 | 195        | 436      | 806   |                |                |                            |
| NPC cases                                 |                     |            |          |       |                |                |                            |
| [0, 0.2]                                  | 3                   | 4          | 0        | 7     | 31 (4%)        | 89 (12%)       | -0.08                      |
| [0.2, 0.3]                                | 8                   | 0          | 27       | 35    |                |                |                            |
| [0.3, 1]                                  | 25                  | 56         | 594      | 675   |                |                |                            |
| Total                                     | 36                  | 60         | 621      | 717   |                |                |                            |
| NRI = 0.30 (95% CI: 0.26–0.34), P < 0.001 |                     |            |          |       |                |                |                            |

NRI: net reclassification improvement, CI: confidence interval.

**Supplementary Table S3: Age and gender distributions of subjects in study population 2 (2,023 nasopharyngeal carcinoma cases and 2,009 healthy controls)**

|                      | Cases     | Controls  |
|----------------------|-----------|-----------|
| Male                 | 1,526     | 1,354     |
| Female               | 497       | 655       |
| Mean age (years, SD) | 46 (11.5) | 45 (11.9) |
| Total number         | 2,023     | 2,009     |

SD: standard deviation.

**Supplementary Table S4: Age and gender distributions of subjects in study population 3 (1,026 nasopharyngeal carcinoma cases and 1,148 population-based controls)**

| Variables    | Cases       | Controls    |
|--------------|-------------|-------------|
| Sex (N, %)   |             |             |
| Male         | 743 (72%)   | 839 (73%)   |
| Female       | 283 (28%)   | 309 (27%)   |
| Age (years)  |             |             |
| Mean (SD)    | 47.9 (11.0) | 49.1 (10.9) |
| < 30         | 150 (5%)    | 44 (4%)     |
| 30–40        | 202 (20%)   | 194 (17%)   |
| 41–50        | 374 (36%)   | 419 (37%)   |
| 51–60        | 266 (26%)   | 304 (26%)   |
| > 60         | 134 (13%)   | 187 (16%)   |
| Total number | 1,026       | 1,148       |

SD: standard deviation.

**Supplementary Table S5: Two sets of nested primers for amplification of the Epstein-Barr virus *RPMS1* gene**

|       |         |                               |
|-------|---------|-------------------------------|
| Outer | RPMS1-1 | gct ggg ttga tgc tgt aga tg   |
| Outer | RPMS1-2 | agg gtc tgg acg tgg agt ttg   |
| Inner | RPMS1-3 | aga agg cgt aga gca tgt cca g |
| Inner | RPMS1-4 | gag tac gac tgt gag gtg ggc g |

**Supplementary Table S6: Primers used for the Sequenom MassArray single nucleotide polymorphism (SNP) genotyping of 7 host SNPs and 1 Epstein-Barr virus variant**

| Locus ID      | 2nd PCR                                                | 1st PCR                                            | UEP_SEQ                                   | EXT1_SEQ                                       | EXT2_SEQ                                     |
|---------------|--------------------------------------------------------|----------------------------------------------------|-------------------------------------------|------------------------------------------------|----------------------------------------------|
| rs1412829     | ACGTT<br>GGATG<br>CATGC<br>TTTGG<br>GAAAC<br>TCTAC     | ACGTT<br>GGATG<br>CCATT<br>GCTAT<br>GGTTA<br>CTATC | CTACC<br>CATGA<br>GATTC<br>ATATT<br>CAAGC | CTACC<br>CATGA<br>GATTC<br>ATATT<br>CAAG<br>CA | CTACCC<br>ATGAGA<br>TTCATAT<br>TCAAGCG       |
| rs28421666    | ACGTT<br>GGATG<br>CTGTT<br>GGGA<br>GGAG<br>AAAA<br>ATG | ACGTT<br>GGATG<br>ATCTA<br>TACTG<br>TGATA<br>TTTAT | CATTA<br>AGATC<br>CTTCC<br>TGTTTT         | CATTA<br>AGATC<br>CTTCC<br>TGTTT<br>TC         | CATTAA<br>GATCCT<br>TCCTG<br>TTTTT           |
| rs2860580     | ACGTT<br>GGATG<br>TTCCC<br>TGCTT<br>CATTG<br>TGCAAT    | ACGTT<br>GGATG<br>TTACA<br>GTCAT<br>GGCAG<br>AAGTG | CTCTC<br>TCCTG<br>TCACC<br>AC             | CTCT<br>CTCC<br>TGTC<br>ACCA<br>CA             | CTCTC<br>TCCTG<br>TCACC<br>ACG               |
| rs2894207     | ACGTT<br>GGATG<br>GCTTA<br>TGTTT<br>TCTTC<br>TAAGAG    | ACGTT<br>GGATG<br>TGCAA<br>AAGAA<br>TAAAG<br>CTGG  | TTTTCT<br>TCTAA<br>GAGTT<br>CTCTAAT       | TTTTC<br>TTCTA<br>AGAGT<br>TCTCT<br>AATA       | TTTTC<br>TTCTA<br>AGAG<br>TTCT<br>CTAATG     |
| rs31489       | ACGTT<br>GGATG<br>TCGCA<br>TTCCA<br>CCTGT<br>TTACG     | ACGTTG<br>GATGTA<br>CACTTT<br>CAGCCT<br>GGTGAC     | ctTTCT<br>TCTTC<br>CTCTT<br>TAAAA<br>GT   | ctTTCT<br>TCTTC<br>CTCTT<br>TAAAA<br>GTC       | ctTTCT<br>TCTTC<br>CTCTT<br>TAAAA<br>GTA     |
| rs6774494     | ACGTT<br>GGATG<br>TACGG<br>TAGAT<br>GCCAT<br>TAAGG     | ACGTTG<br>GATGCT<br>ATCTTA<br>CTTACA<br>TTTACC     | gcGGA<br>AAAC<br>AGTC<br>AATAT<br>GTCAC   | gcGGAA<br>AACAG<br>TCAAT<br>ATGTC<br>ACC       | gcGGA<br>AAAC<br>AGTC<br>AATA<br>TGTC<br>ACT |
| rs9510787     | ACGTT<br>GGATG<br>GGCTG<br>ACCTG<br>CAACT<br>CTTAG     | ACGTTG<br>GATGGA<br>TTTATTA<br>CTTATTG<br>GTGC     | gTCAT<br>AGTC<br>TTAGA<br>AGAC<br>AGC     | gTCATA<br>GTCTT<br>AGAAG<br>ACAGCA             | gTCAT<br>AGTC<br>TTAG<br>AAGA<br>CAGCG       |
| EBV_Loc155391 | ACGTT<br>GGATG<br>AGGCC<br>CTGGC<br>CTTCG<br>ATAT      | ACGTT<br>GGATG<br>GATATC<br>TGCAG<br>GATCA<br>GGTC | CCTTC<br>GATAT<br>CGAG<br>TGT             | CCTTC<br>GATAT<br>CGAG<br>TGTC                 | CCTT<br>CGAT<br>ATCG<br>AGT<br>GTT           |
